# Supplementary material for: Physiological and Genomic Characterization of a Novel Obligately Chemolithoautotrophic, Sulfur-Oxidizing Bacterium of Genus Thiomicrorhabdus Isolated from a Coastal Sediment
Source: MDPI journal article supplement (doi:10.3390/microorganisms11102569), 2023-10-15
Supplement: s1 [file s1]

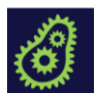

## Supplements

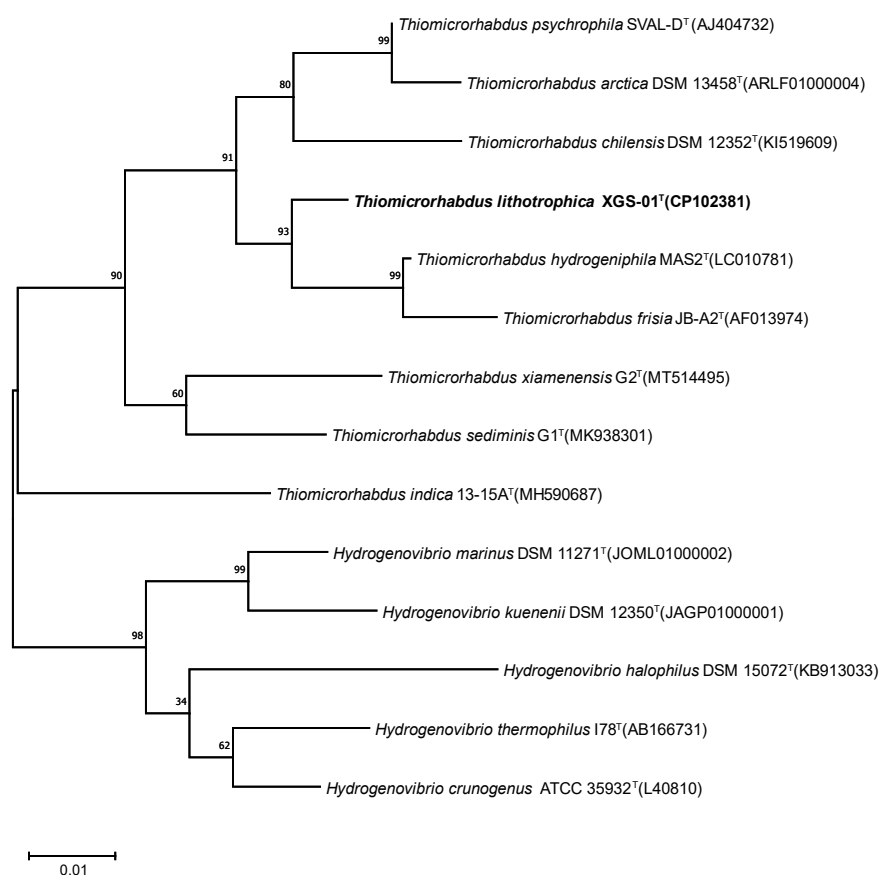

**Figure S1.** Maximum-likelihood phylogenetic tree based on 16S rRNA gene sequences showing the relationship between strain XGS-01T and members of the genus *Thiomicrorhabdus*. Bootstrap values (>50%) based on 1000 replicates are shown at branch nodes. Bar, 0.01 substitutions per nucleotide position.

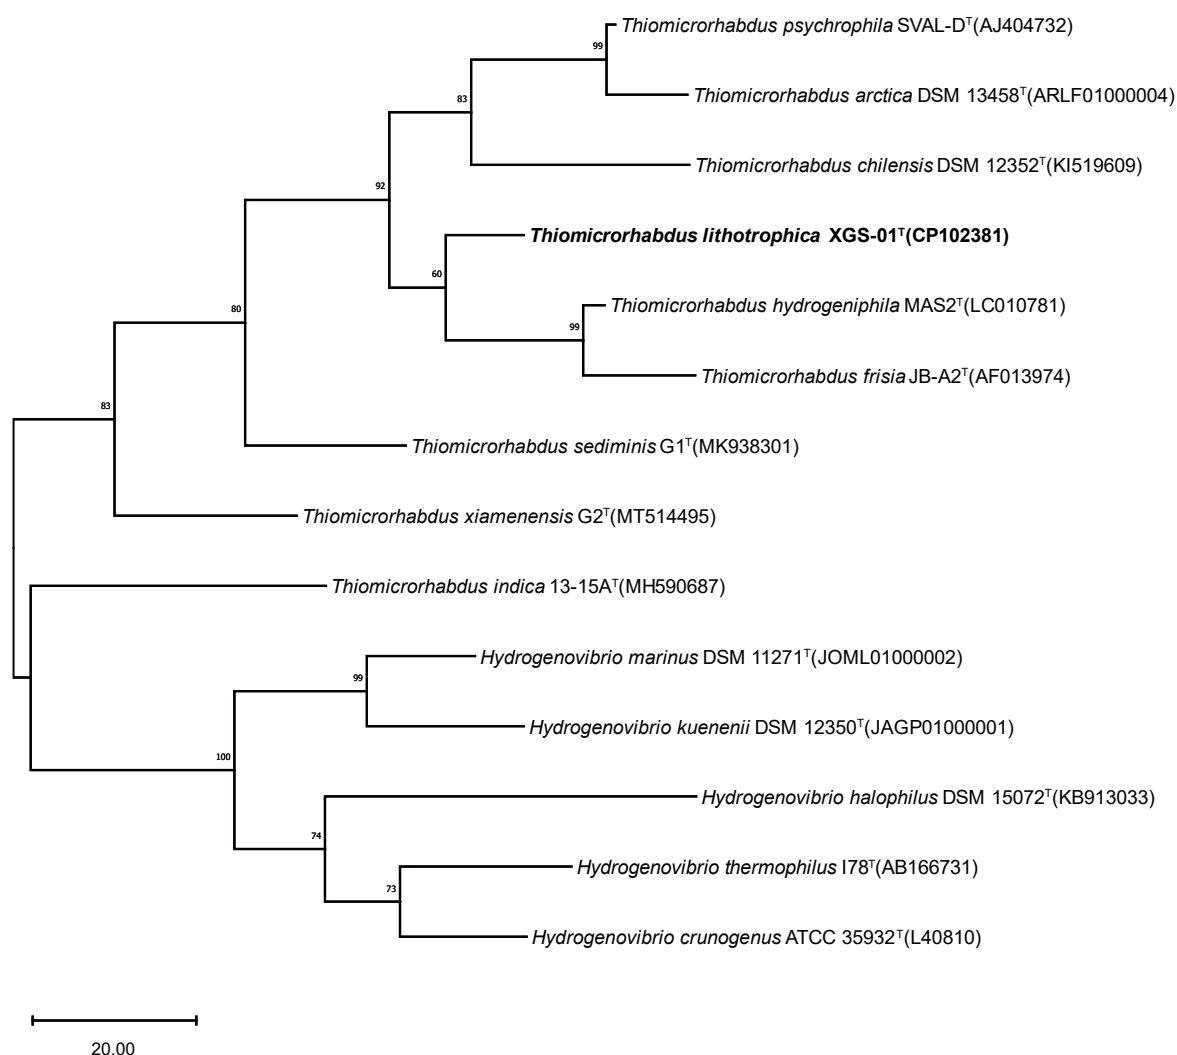

**Figure S2.** Maximum-Parsimony phylogenetic tree based on 16S rRNA gene sequences showing the relationship between strain XGS-01T and members of the genus *Thiomicrorhabdus*. Bootstrap values (>50%) based on 1000 replicates are shown at branch nodes. Bar, 0.01 substitutions per nucleotide position.

---

> *Thiomicrothrix lithotrophica* XGS-01<sup>T</sup> 16S ribosomal RNA gene, complete sequence

ATTAAACTGAAGAGTTTGATCCTGGCTCAGAATGAACGCTGGCGGTAGGCTTAACACATG  
CAAGTCGGACGGAAACGATAGAGAACTTGTTTTCTAGGCGTCGAGTGGCGGACGGGTG  
AGTAACGCGTGGGAATCTACCCTGTAGTTGGGGACAACATATGGAAACGTATGCTAATAC  
CGAATATGCTCTACGGAGTAAAGGAGCCCTCTTCTTGAAAGGTTTCGCTATAGGATGAGC  
CCGCGTGAGATTAGCTAGTTGGTAAGGTAATGGCTTACCAAGGCGACGATCTCTAGCTGG  
TTTGAGAGGATGATCAGCCACACTGGGACTGAGACACGGCCCAGACTCCTACGGGAGGC  
AGCAGTGGGGAATATTGCACAATGAGCGAAAGCTTGATGCAGCCATACCGCGTGTGTGA  
AGAAGGCCCGAGGGTTGTAAAGCACTTTCAATTGTGAGGAAGATAGAGTAGTTAATACCT  
GCTTTATTTGACGTTAACTTTAGAAGAAGCACCGGCTAACTCTGTGCCAGCAGCCGCGGTA  
ATACAGAGGGTGCAAGCGTTATTCGGAATTACTGGGCGTAAAGCGCGCGTAGGCGGGCT  
ATTAAGTCAGTTGTGAAAGCCCTGGGCTCAACCTGGGAACTGCATCTGATACTGGTAGTCT  
AGAGTTTAAGAGAGGGAAGTGGAATTCCAGGTGTAGCAGTGAAATGCGTAGATATCTGG  
AGGAACATCAGTGGCGAAGGCGACTTCCTGGCTTAAAACTGACGCTGAGGTGCGAAAGC  
GTGGGTAGCGAACGGGATTAGATACCCCGGTAGTCCACGCCGTAAACGATGTCAACTAGT  
TGTTGGTCTTATTA AAAAGATTAGTAACGAAGCTAACGCGATAAGTTGACCGCCTGGGGA  
GTACGGTCGCAAGATTAAAACTCAAAGGAATTGACGGGGGGCCCGCACAAGCGGTGGAGC  
ATGTGGTTTAATTCGATGCAACGCGAAGAACCTTACCATCCCTTGACATGTAGAGAACTTT  
CTAGAGATAGATTGGTGCCTTCGGGA ACTCTAACACAGGTGCTGCATGGCTGTCGTCAGCT  
CGTGTGCTGTGAGATGTTGGGTAAAGTCCCGCAACGAGCGCAACCCTTATCATTAGTTGCT  
AACATTTAGTTGAGAACTCTAATGAGACTGCCGGTGATAAACCGGAGGAAGGCGGGGAC  
GACGTCAAGTCATCATGGCCCTTATGGGATGGGCTACACACGTGCTACAATGGGGGGTAC  
AAAGAGCAGCCAACTGGCAACAGTGCGCGAATCTCAAAAAACCCCTCGTAGTCCGGATT  
GGAGTCTGCAACTCGACTCCATGAAGTCGGAATCGCTAGTAATCGCGGATCAGAATGCCG  
CGGTGAATACGTTCCCGGGCCTTGTACACACCGCCCGTCACACCATGGGAGTGGATTGCA  
AAAGAAGTAGGTAGCTTAACCTTCGGGAGAGCGCTTACCACTTTGTGGTTCATGACTGGG  
GTGAAGTCGTAACAAGGTAGCCCTAGCGGAAGCTGGGGCTGGATCACCTCCTTTAA
